# Supplementary material for: The ARTICO study: identification of patients at high risk of vascular recurrence after a first non-cardioembolic stroke
Source: PubMed Central journal article supplement (PMC4369369; doi:10.1186/s12883-015-0278-4), 2015-03-11
Supplement: 12883_2015_278_MOESM1_ESM.pdf [file 12883_2015_278_MOESM1_ESM.pdf]

## 1 **Appendix 2**

### 2 **List of participating centres and ARTICO investigators**

- 3
- 4 Enrique Jiménez Caballero (Hospital Virgen de la Salud, Toledo).
- 5 Jaime Roquer Gonzalez (Hospital del Mar, Barcelona).
- 6 Mercedes Romera (Hospital de Valme, Sevilla).
- 7 Mar Castellanos, Yolanda Silva (Hospital Universitario Dr. Josep Trueta, Girona).
- 8 Jorge García García (Hospital General Universitario, Albacete).
- 9 Miguel Blanco (Hospital Clínico Universitario, Santiago de Compostela).
- 10 Vicente Medrano Martínez (Hospital General de Elda, Alicante).
- 11 Jose M<sup>a</sup> Ramirez (Hospital San Pedro Alcántara, Cáceres).
- 12 Exuperio Díez Tejedor (Hospital Universitario La Paz, Madrid).
- 13 Sergio Calleja (Hospital Central de Asturias, Oviedo).
- 14 Adriá Arboix Damunt (Hospital Sagrat Cor, Barcelona).
- 15 Luís García-Tuñón Villaluenga (Hospital de León).
- 16 Jose A Egido Herrero (Hospital Clínico Universitario San Carlos, Madrid).
- 17 Covadonga Fernández Maiztegui (Hospital de Cruces, Barakaldo).
- 18 Jaime Masjuan Vallejo (Hospital Ramón y Cajal, Madrid).
- 19 Rosa M<sup>a</sup> Sánchez Pérez (Hospital Marina Baixa, Alicante).
- 20 Jose Miguel Pons Amate (Hospital General Universitario, Valencia).
- 21 Raul Espinosa (Hospital Puerta del Mar, Cádiz).
- 22 Ángel Fernández Díaz (Hospital Comarcal del Bierzo, León).
- 23 Ernest Palomerias Soler (Hospital de Mataró, Barcelona).
- 24 Victoria Mejías (Hospital Torrecárdenas, Almería).
- 25 Carmen Jiménez Martínez (Hospital Universitario Son Dureta, Palma de Mallorca).
- 26 Manuel Márquez Martínez (Hospital Clínico Univ. Virgen de la Victoria, Málaga).
- 27 Alejandro García Escrivá (Hospital de Levante, Alicante).
- 28 Pere Comas (Hospital de Sant Joan de Deu de Martorell, Barcelona).
- 29 Jose Tembl Ferrairó (Hospital Universitario La Fe, Valencia).
- 30 Rosario Gil (Hospital Clínico Universitario, Valencia).
- 31 Mayte Martínez (Complejo Hospitalario Donostia).
- 32 Roberto Belvis (USP Institut Universitari Dexeus, Barcelona).
- 33 Francisco Moniche Álvarez (Hospital Virgen del Rocío, Sevilla).
- 34 Javier Abella (Hospital Arquitecto Marcide, La Coruña).
- 35 Gemma Reig Roselló (Hospital Universitario de La Princesa, Madrid).
- 36 Oscar Fernández Fernández (Hospital Carlos Haya, Málaga).
- 37 Isabel Campello (Hospital Royo Villanova, Zaragoza).
- 38 Toni Figuerola (Hospital de Son Llatzer, Palma de Mallorca).
- 39 Jordi Sanahuja Montesinos (Hospital Universitari Arnau de Vilanova, Lleida).
- 40 Enrique Botia Paniagua (Complejo Hospitalario La Mancha Centro, Ciudad Real).
- 41 Jose Manuel Moltó Jordá (Hospital Francesc de Borja, Valencia).
- 42 Jose Luis Martí Vilalta (Hospital de la Santa Creu i Sant Pau, Barcelona).
- 43 Jose M<sup>a</sup> Ramirez (Hospital Universitario Infanta Cristina, Badajoz).
- 44 Elena Vila Herrero (Clínica Santa Elena, Málaga).
- 45 Marta Ferrero Ros (Hospital General, Segovia).
