# Supplementary material for: The ARTICO study: identification of patients at high risk of vascular recurrence after a first non-cardioembolic stroke
Source: PubMed Central journal article supplement (PMC4369369; doi:10.1186/s12883-015-0278-4), 2015-03-11
Supplement: 12883_2015_278_MOESM2_ESM.pdf [file 12883_2015_278_MOESM2_ESM.pdf]

1 **Appendix 2.**

2 **List of Investigational Review Boards/Ethics Committees that approved the performance**  
3 **of this study**

- 4  
5 Virgen de la Salud IRB, Toledo.  
6 IMIM-Hospital del Mar Ethics Committee.  
7 Hospital de Valme IRB, Sevilla  
8 Comitè d'Ètica d'investigació Clínica del Hospital Universitari Doctor Josep Trueta.  
9 Comité Ético de Investigación Clínica del Complejo Hospitalario Universitario de Albacete  
10 Comité Ético de Investigación Clínica de Galicia.  
11 Hospital General de Elda Ethics Committee, Alicante  
12 Comité Ético de Investigación Clínica del Hospital San Pedro Alcántara, Cáceres  
13 Comité Ético de Investigación Clínica del Hospital Universitario La Paz, Madrid  
14 IRB Hospital Central de Asturias, Oviedo  
15 Hospital Sagrat Cor ethics committee, Barcelona  
16 Hospital de León IRB, León  
17 Comité Ético de Investigación Clínica Hospital Clínico Universitario San Carlos, Madrid  
18 IRB Hospital de Cruces, Baracaldo  
19 Comité Ético de Investigación Clínica Hospital Ramón y Cajal, Madrid  
20 IRB Hospital Marina Baixa, Alicante  
21 Comité Ético de Investigación Clínica Hospital General Universitario, Valencia  
22 IRB Hospital Puerta del Mar, Cádiz  
23 Hospital Comarcal del Bierzo Ethics Committee, León  
24 Comité Ético de Investigación Clínica Hospital de Mataró, Barcelona  
25 IRB Hospital Torrecárdenas, Almería  
26 Hospital Universitario Son Dureta IRB, Palma de Mallorca  
27 Comité Ético de Investigación Clínica Hospital Clínico Univ. Virgen de la Victoria, Málaga  
28 IRB Hospital de Levante, Alicante  
29 Hospital de Sant Joan de Deu de Martorell IRB, Barcelona  
30 Comité Ético de Investigación Clínica Hospital Universitario La Fe, Valencia  
31 Hospital Clínico Universitario IRB, Valencia  
32 Comité Ético de Investigación Clínica Complejo Hospitalario Donostia  
33 USP Institut Universitari Dexeus, Barcelona  
34 IRB Hospital Virgen del Rocío, Sevilla  
35 Comité Ético de Investigación Clínica Hospital Arquitecto Marcide, La Coruña  
36 Comité Ético de Investigación Clínica Hospital Universitario de La Princesa, Madrid  
37 Hospital Carlos Haya IRB, Málaga  
38 IRB Hospital Royo Villanova, Zaragoza  
39 Hospital de Son Llatzer IRB, Palma de Mallorca  
40 Comité Ético de Investigación Clínica Hospital Universitari Arnau de Vilanova, Lleida  
41 Comité Ético de Investigación Clínica Complejo Hospitalario La Mancha Centro, Ciudad Real  
42 Hospital Francesc de Borja ethics committee, Valencia  
43 Comité Ético de Investigación Clínica Hospital de la Santa Creu i Sant Pau, Barcelona  
44 Hospital Universitario Infanta Cristina IRB, Badajoz  
45 IRB Clínica Santa Elena, Málaga  
46 Hospital General IRB, Segovia
